# Supplementary material for: Determining Susceptibility and Potential Mediators of Resistance for the Novel Polymyxin Derivative, SPR206, in Acinetobacter baumannii
Source: MDPI journal article supplement (doi:10.3390/antibiotics13010047), 2024-01-04
Supplement: s1 [file s1]

Supplemental Table S1. Mutations in Genes Encoding for OmpA family Proteins for 14 COL-resistant and CRAB isolates

| position  | mutation  | R10074 | R10141 | R10363 | R10409 | R11248 | R11252 | R8379 | R8402 | R8407 | R8410 | R9569 | R9645 | R9656 | R9788 | annotation               | gene          | description         |
|-----------|-----------|--------|--------|--------|--------|--------|--------|-------|-------|-------|-------|-------|-------|-------|-------|--------------------------|---------------|---------------------|
| 514,005   | C→T       |        |        | 100%   |        |        |        |       |       |       |       |       |       |       |       | A12T (GCA→ACA)           | F3P16_02520 ← | OmpA family protein |
| 622,556   | 2 bp→CT   |        |        | 100%   | 100%   |        |        |       |       |       |       |       |       |       | 100%  | coding (113-114/1071 nt) | F3P16_03030 → | OmpA family protein |
| 622,584   | 2 bp→CG   |        |        | 100%   | 100%   |        |        |       |       |       |       |       |       |       | 100%  | coding (141-142/1071 nt) | F3P16_03030 → | OmpA family protein |
| 622,587   | C→G       |        |        | 100%   | 100%   |        |        |       |       |       |       |       |       |       | 100%  | N48K (AAC→AAQ)           | F3P16_03030 → | OmpA family protein |
| 622,596   | 4 bp→TTCA | 100%   | 100%   |        |        | 100%   | 100%   | 100%  | 100%  | 100%  | 100%  | 100%  | 100%  | 100%  |       | coding (153-156/1071 nt) | F3P16_03030 → | OmpA family protein |
| 622,707   | 2 bp→T    |        |        | 100%   | 100%   |        |        |       |       |       |       |       |       |       | 100%  | coding (264-265/1071 nt) | F3P16_03030 → | OmpA family protein |
| 622,711   | +G        |        |        | 100%   | 100%   |        |        |       |       |       |       |       |       |       | 100%  | coding (268/1071 nt)     | F3P16_03030 → | OmpA family protein |
| 622,961   | C→G       |        |        | 100%   | 100%   |        |        |       |       |       |       |       |       |       | 100%  | A173G (GCT→GCT)          | F3P16_03030 → | OmpA family protein |
| 622,971   | 3 bp→CTT  |        |        | 100%   | 100%   |        |        |       |       |       |       |       |       |       | 100%  | coding (528-530/1071 nt) | F3P16_03030 → | OmpA family protein |
| 622,981   | G→A       |        |        | 100%   | 100%   |        |        |       |       |       |       |       |       |       | 100%  | E180K (GAG→AAG)          | F3P16_03030 → | OmpA family protein |
| 2,501,958 | C→T       |        |        |        | 100%   |        |        |       |       |       |       |       |       |       | 100%  | V35I (GTA→ATA)           | F3P16_11815 ← | OmpA family protein |
| 2,502,003 | C→T       |        |        |        | 100%   |        |        |       |       |       |       |       |       |       | 100%  | A20T (GCA→ACA)           | F3P16_11815 ← | OmpA family protein |
| 2,674,297 | C→T       |        |        |        | 100%   |        |        |       |       |       |       |       |       |       | 100%  | D400N (GAT→AAT)          | F3P16_12590 ← | OmpA family protein |
| 2,674,639 | T→C       | 100%   | 100%   | 100%   |        | 100%   | 100%   | 100%  | 100%  | 100%  | 100%  | 100%  | 100%  | 100%  |       | N286D (AAC→GAC)          | F3P16_12590 ← | OmpA family protein |
| 2,674,759 | C→T       |        |        |        | 100%   |        |        |       |       |       |       |       |       |       | 100%  | V246I (GTT→ATT)          | F3P16_12590 ← | OmpA family protein |
| 2,674,861 | C→T       |        |        |        | 100%   |        |        |       |       |       |       |       |       |       | 100%  | A212T (GCT→ACT)          | F3P16_12590 ← | OmpA family protein |
| 2,674,903 | T→C       | 100%   | 100%   | 100%   | 100%   | 100%   | 100%   | 100%  | 100%  | 100%  | 100%  | 100%  | 100%  | 100%  | 100%  | T198A (ACA→QCA)          | F3P16_12590 ← | OmpA family protein |
| 2,675,347 | T→C       |        |        |        | 100%   |        |        |       |       |       |       |       |       |       | 100%  | I50V (ATA→GTA)           | F3P16_12590 ← | OmpA family protein |
| 2,884,210 | A→C       |        |        |        | 100%   |        |        |       |       |       |       |       |       |       | 100%  | L233V (TTA→GTA)          | F3P16_13615 ← | OmpA family protein |
| 2,884,336 | A→G       | 100%   | 100%   | 100%   | 100%   | 100%   | 100%   | 100%  | 100%  | 100%  | 100%  | 100%  | 100%  | 100%  | 100%  | S191P (TCA→CCA)          | F3P16_13615 ← | OmpA family protein |
| 2,884,448 | A→T       | 100%   | 100%   | 100%   |        | 100%   | 100%   | 100%  | 100%  | 100%  | 100%  | 100%  | 100%  | 100%  |       | D153E (GAT→GAA)          | F3P16_13615 ← | OmpA family protein |
| 2,884,497 | 2 bp→CG   | 100%   | 100%   | 100%   | 100%   | 100%   | 100%   | 100%  | 100%  | 100%  | 100%  | 100%  | 100%  | 100%  | 100%  | coding (409-410/780 nt)  | F3P16_13615 ← | OmpA family protein |
| 2,884,500 | G→T       | 100%   | 100%   | 100%   | 100%   | 100%   | 100%   | 100%  | 100%  | 100%  | 100%  | 100%  | 100%  | 100%  | 100%  | A136E (CCA→CAA)          | F3P16_13615 ← | OmpA family protein |
| 2,884,518 | T→G       | 100%   | 100%   | 100%   |        | 100%   | 100%   | 100%  | 100%  | 100%  | 100%  | 100%  | 100%  | 100%  |       | E130A (GAA→GCA)          | F3P16_13615 ← | OmpA family protein |
| 2,884,524 | A→C       |        |        |        | 100%   |        |        |       |       |       |       |       |       |       | 100%  | L128W (TTC→TGC)          | F3P16_13615 ← | OmpA family protein |
| 2,884,527 | A→G       |        |        |        | 100%   |        |        |       |       |       |       |       |       |       | 100%  | V127A (GTT→GCT)          | F3P16_13615 ← | OmpA family protein |
| 2,884,553 | 2 bp→TC   |        |        |        | 100%   |        |        |       |       |       |       |       |       |       | 100%  | coding (353-354/780 nt)  | F3P16_13615 ← | OmpA family protein |
| 2,884,597 | T→C       |        |        |        | 100%   |        |        |       |       |       |       |       |       |       | 100%  | I104V (ATT→GTT)          | F3P16_13615 ← | OmpA family protein |
| 2,884,624 | G→T       |        |        |        | 100%   |        |        |       |       |       |       |       |       |       | 100%  | H95N (CAC→AAC)           | F3P16_13615 ← | OmpA family protein |
| 2,884,642 | T→C       |        |        |        | 100%   |        |        |       |       |       |       |       |       |       | 100%  | I89V (ATC→GTC)           | F3P16_13615 ← | OmpA family protein |

Supplemental Table S1. *Cont.*

|           |         |      |      |      |      |      |      |      |      |      |      |      |      |      |      |                         |               |                     |
|-----------|---------|------|------|------|------|------|------|------|------|------|------|------|------|------|------|-------------------------|---------------|---------------------|
| 2,884,648 | 2 bp→AT |      |      |      | 100% |      |      |      |      |      |      |      |      |      | 100% | coding (258-259/780 nt) | F3P16_13615 ← | OmpA family protein |
| 2,884,753 | T→C     | 100% | 100% | 100% |      | 100% | 100% | 100% | 100% | 100% | 100% | 100% | 100% | 100% |      | I52V (ΔTT→GTT)          | F3P16_13615 ← | OmpA family protein |
| 2,884,819 | C→T     | 100% | 100% | 100% |      | 100% | 100% | 100% | 100% | 100% | 100% | 100% | 100% | 100% |      | E30K (GAA→AAA)          | F3P16_13615 ← | OmpA family protein |
| 2,884,824 | T→G     |      |      |      | 100% |      |      |      |      |      |      |      |      |      | 100% | Q28P (CAA→CCA)          | F3P16_13615 ← | OmpA family protein |

Shown in Supplemental Table S1 are mutations found in genes encoding for OmpA family proteins in the 14 sequenced COL-resistant and CRAB isolates.
